# Supplementary material for: Preliminary Identification of Potential Vaccine Targets for the COVID-19 Coronavirus (SARS-CoV-2) Based on SARS-CoV Immunological Studies
Source: MDPI journal article supplement (doi:10.3390/v12030254), 2020-02-25
Supplement: s1 [file s1]

```

MFIFLLFLTLTSGSDLRCTTFDDVQAPNYTQHTSSMRGVYYPDEIFRSDTLYLTDQLFLPFYSNVTGFH 70
MFVFLVLLPLVSSQCQVNLTRTQ--LPPAYTN--SFTRGVYYPDKVFRSSVLHSTQDLFLPFYSNVTWFH 70
* * * * *
TINHT-----FGNPVPIPKDGIYFAATEKSNVVRGWVFGSTMNNKSQSVIIINNSTNVIRACNFELC 140
AIHVSGTNGTKRFDNPVLPFNDGVYFASTEKSNIIRGWIFGTTLDSKTQSLIVNNATNVVIKVECFQFC 140
* * * * *
DNPFFAV---SKPMGTQTHMIFDNAFNCTFEYISDAFSLDVSEKSGNFKHLEFVFKNKDGLYVYKG 210
NDPFLGVYYHKNNKSWMESEFRVYSSANNCTFEYVSQPFLLMDLEGGKQGNFKNLEFVFKNKIDGYFKIYSK 210
* * * * *
YQPIDVVRDLPSGFNTLKPIFKLPLGINITNFRAIL---TAFSPAQDI--WGTSAAAYFVGYLKPTTFM 280
HTPINLVRDLFPQGFSALEPLVDLPIGINITRFQTLALHRSYLTTPGDSSSGWTAGAAAYYVGYLQPRTF 280
* * * * *
LKYDENGITITDAVDCSQNLAEKCSVKSFEDKGIYQTSNFRVVPDGVVFPNITNLCPFGEVFNATK 350
LKNYENGTITDAVDCALDPLSETKCTKLSFTVEKGIYQTSNFRVQPTESIVRFPNITNLCPFGEVFNATR 350
* * * * *
FPSVYAWERKKISNCVADYSVLVNSTFFSTFKCYGVSATKLNLCFSNVYADSFVVKGDDVVRQIAPGQTG 420
FASVYAWNRKRISNCVADYSVLVNSASFSTFKCYGVSPKLNLCFTNVYADSFVIRGDEVVRQIAPGQTG 420
* * * * *
VIADYNYKLPDDFMGCVLANWNRNIDATSTGNYNYKYRYLRHGKLRPFERDISNVFPSPDGKPCPT-PAL 490
KIADYNYKLPDDFTGCVIAWNSNLDKVGNGYNYLYRLFRKSNLKPFERDISTEIIYQAGSTPCNGVEGF 490
* * * * *
NCYWPLNDYGFYTTTGIGYQPYRVVLSFELLNAPATVCGPKLSTDLIKNQCVNFNGLTGTGVLTPSS 560
NCYFPLQSYGFQPTNGVGYQPYRVVLSFELLHAPATVCGPKKSTNLVKNKCVNFNGLTGTGVLTESN 560
* * * * *
KRFQPFQQFGRDVSDFDTSVRDPKTSSEILDISPCAFGGVSVITPGTNASSEVAVLYQDVNCTDVSTAIHA 630
KKFLFPQQFGRDIADTTDAVRDPQTLEILDITPCSFGGVSVITPGTNTSNQVAVLYQDVNCTEVPVAIHA 630
* * * * *
DQLTPAWRIYSTGNNVFQTOAGCLIGAEHVDTSYECDIPIGAGICASYHTVS---LLRSTSQKSIVAYT 700
DQLTPTRWRYSTGNNVFQTRAGCLIGAEHVNSYECDIPIGAGICASYQTQNSPRRARSVASQSI IAYT 700
* * * * *
MSLGADSSIAYSNNTIAIPTNFSISITTEVMPVSMAKTSVDCNMYICGDSTECANLLQYGSFCTQLNRA 770
MSLGAENSVAYSNNSIAIPTNFTISVTTEILPVSMTKTSVDCNMYICGDSTECANLLQYGSFCTQLNRA 770
* * * * *
LSGIAAEQDRNTREVFAQVKQMYKTPTLKYFGGFNFSQILPDPLKPTKRSFIEDLLFNKVTLDAGFMKQ 840
LTGIAVEQDKNTQEVFAQVKQIYKTPPIKDFGGFNFSQILPDPSKPSKRSFIEDLLFNKVTLDAGFIKQ 840
* * * * *
YGECLGDINARDLCAQKFNGLTVLPPLLTDDMIAAYTAALVSGTATAGWTFGAGAALQIPFAMQMAYRF 910
YGDCLDGIAARDLCAQKFNGLTVLPPLLTDEMIAQYTSALLAGTITSGWTFGAGAALQIPFAMQMAYRF 910
* * * * *
NGIGVTQNVLYENQKQIANQFNKAISQIQESLTTSTALGKLQDVVNQNAQALNTLVKQLSSNFGAISSV 980
NGIGVTQNVLYENQKLIQNSAIGKIQDSLSTASALGKLQDVVNQNAQALNTLVKQLSSNFGAISSV 980
* * * * *
LNDILSRDLKVEAEVQIDRLITGRLQSLQTYVTQQLIRAAEIRASANLAATKMSECVLGQSKRVDFCGKG 1050
LNDILSRDLKVEAEVQIDRLITGRLQSLQTYVTQQLIRAAEIRASANLAATKMSECVLGQSKRVDFCGKG 1050
* * * * *
YHLMSPQAAAPHGVVFLHVTVYVPSQERNFTTAPAICHEGKAYFPREGVVFVNGTSWFITQRNFFSPQIIT 1120
YHLMSPQASAPHGVVFLHVTVYVPAQEKNFTTAPAICHGKAHFPREGVFSNGTHWFVTQRNFYEPQIIT 1120
* * * * *
TDNTFVSGNCDVVIGIINNVTYDPLQPELDSFKEELDKYFKNHTSPDVLGDISGINASVVNIQKEIDRL 1190
TDNTFVSGNCDVVIGIVNNTYDPLQPELDSFKEELDKYFKNHTSPDVLGDISGINASVVNIQKEIDRL 1190
* * * * *
NEVAKNLNESLIDLQELGKYEQYIKWPWYVWLGFIAGLIAIVMVTILLCCMTSCCCLKGACSCGSCCKF 1260
NEVAKNLNESLIDLQELGKYEQYIKWPWYIWLGFIAGLIAIVMVTIMLCCMTSCCCLKGCCSCGSCCKF 1260
* * * * *
DEDDSEPVLGKVKLHYT 1277
DEDDSEPVLGKVKLHYT 1277
* * * * *

```

**Figure S3.** Pairwise sequence alignment of the reference sequences of the S proteins of SARS-CoV and SARS-CoV-2 (accession ID: NP\_828851.1 and YP\_009724390.1, respectively). Identical residues are indicated by \*.
