# Supplementary material for: Preliminary Identification of Potential Vaccine Targets for the COVID-19 Coronavirus (SARS-CoV-2) Based on SARS-CoV Immunological Studies
Source: MDPI journal article supplement (doi:10.3390/v12030254), 2020-02-25
Supplement: s1 [file s1]

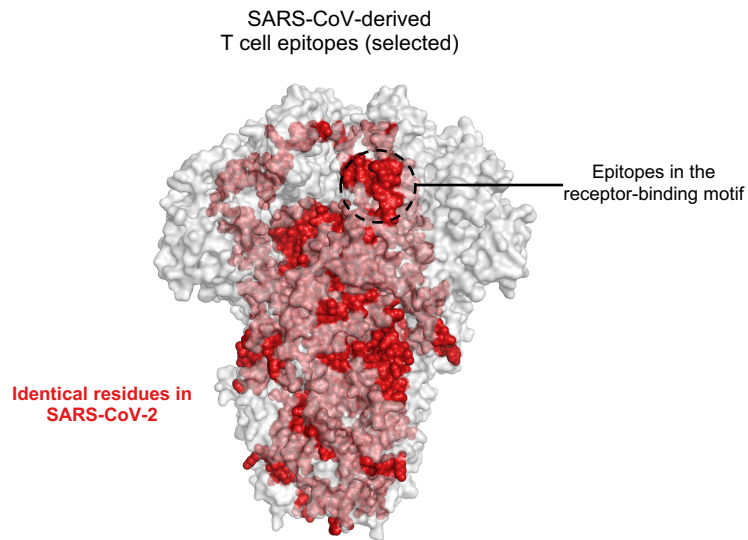

**Figure S2.** Location of identified T cell epitopes on the SARS-CoV S protein structure (PDB ID: 5XLR). Residues of the SARS-CoV-derived T cell epitopes (determined using positive MHC binding assays and that were identical in SARS-CoV-2) are shown in red color. The dark and light shade reflect the surface and buried residues, respectively. The 3 overlapping epitopes (GYQPVRVVVL, QPVRVVLSF, PVRVVLSF) that lie within the SARS-CoV receptor-binding motif are indicated by the dashed circle.
